1 **Identification and characterization of novel mutants of Nsp13 protein among Indian**  
2 **SARS-CoV-2 isolates.**

3 Deepa Kumari<sup>1</sup>, Namrata Kumari<sup>2</sup>, Sudhir Kumar<sup>3</sup>, Prabhat Kumar Sinha<sup>4</sup>, Shivendra Kumar  
4 Shahi<sup>5</sup>, Nihar Ranjan Biswas<sup>6</sup>, Abhay Kumar<sup>1\*</sup>

5

6 Affiliations:

7 1 Molecular Genomics Laboratory, Department of Microbiology, Indira Gandhi Institute of Medical Sciences, Patna-800014,  
8 India.

9 2 Head, Department of Microbiology, Indira Gandhi Institute of Medical Sciences, Patna-800014, India.

10 3 Addl. Prof., Department of General Medicine, Indira Gandhi Institute of Medical Sciences, Patna-800014, India.

11 4 Ex-Dean (Research), Indira Gandhi Institute of Medical Sciences, Patna-800014, India.

12 5 Visiting Faculty (Microbiology) & Ex-Dean (Acad.), Indira Gandhi Institute of Medical Sciences, Patna-800014, India.

13 6 Director & Vice-chancellor, Indira Gandhi Institute of Medical Sciences, Patna-800014, India.

14

15 \*Correspondence

16 Dr. Abhay Kumar, Scientist II, Molecular Genomics Laboratory, Department of  
17 Microbiology, IGIMS, Patna-800014, Bihar, India.

18 Email address: [abhay.geneticist@gmail.com](mailto:abhay.geneticist@gmail.com)

19

20 **ABSTRACT**

21 SARS-CoV-2, the causative agent of COVID-19 has mutated rapidly which enabled them to  
22 adapt and evade the immune system of the host. Emerging SARS-CoV-2 variants with crucial  
23 mutations pose a global challenge in context of therapeutic drugs and vaccines being  
24 developed globally. There are currently no specific therapeutics or vaccines available to  
25 combat SARS-CoV-2 devastation. In view of this, the current study aimed to identify and  
26 characterize the mutations found in the Nsp13 of SARS-CoV-2 in Indian isolates. Non-  
27 structural protein, Nsp13 protein sequences from Indian isolates were analyzed by comparing  
28 with the first reported Severe acute respiratory syndrome Corona Virus-2 (SARS-CoV-2)  
29 protein sequence from Wuhan, China. Out of 825 Nsp13 protein sequences, a total of 38  
30 mutations were observed among Indian isolates. Our data show that mutations in Nsp13 at  
31 various positions (H164Y, A237T, T214I, C309Y, S236I, P419S, V305E, G54S, H290Y,  
32 P53S, A308Y, and A308Y) have a significant impact on the protein's stability and flexibility.  
33 Also, the impact of Nsp13 mutations on the protein function were predicted based on  
34 PROVEAN score that includes 15 mutants as neutral and 23 mutants as deleterious effect.  
35 Furthermore, B-cell epitopes contributed by Nsp13 were identified using various predictive

36 immunoinformatic tools. Immunological Parameters of Nsp13 such as antigenicity,  
37 allergenicity and toxicity were evaluated to predict the potential B-cell epitopes. The  
38 predicted peptide sequences were correlated with the observed mutants. Our predicted data  
39 showed that there are seven high rank linear epitopes as well as 18 discontinuous B-cell  
40 epitopes based on immunoinformatic tools. Moreover, it was observed that out of total 38  
41 identified mutations among Indian SARS-CoV-2 Nsp13 protein, four mutant residues at  
42 position 142 (E142), 245 (H245), 247 (V247) and 419 (P419) are localised in the predicted B  
43 cell epitopic region. Altogether, the results of the present *in-silico* study might help to  
44 understand the impact of the identified mutations in Nsp13 protein on its stability, flexibility  
45 and function.

46

47 Keywords: SARS-CoV-2, Nsp13, COVID-19, B-cell epitopes, immunoinformatics, India.

48

## 49 INTRODUCTION

50 A recent emergence with an outburst of coronavirus disease 2019 (COVID-19) pandemic  
51 caused by novel beta coronavirus, severe acute respiratory syndrome coronavirus 2 (SARS-  
52 CoV-2) [1] identified first in Wuhan, China, in late Dec 2019 [2-5]. COVID-19 spread  
53 rapidly across the worldwide population and was declared as a global pandemic on 11 March  
54 2020 by World Health Organization (WHO). It has infected hundreds of millions of people  
55 and killed more than three million people worldwide. The world is in the midst of second  
56 wave of pandemic with rapidly evolving new variants of SARS-CoV-2 resulting in surge of  
57 the COVID-19 cases worldwide. The highly contagious nature of SARS-CoV-2 has now  
58 developed into a severe threat to global public health. The manifestations of SARS-CoV-2  
59 ranges from asymptomatic, common cold to lethal viral respiratory illness in infected  
60 individuals [6].

61 Coronaviruses are enveloped with a non-fragmented, large single stranded (positive sense)  
62 RNA virus with GC content ranging from 32% to 43%. They are classified into four genera,  
63 namely, alphacoronavirus ( $\alpha$  CoV), Beta coronavirus ( $\beta$  CoV), gamma coronavirus ( $\gamma$  CoV)  
64 and delta coronavirus ( $\delta$  CoV), respectively [7]. SARS-COV-2 belongs to  $\beta$  coronavirus 2b  
65 lineage with a genome of length 29.9 kb which encodes 29 proteins. [8]. The genomic  
66 sequence of novel CoV, SARS-COV-2 exhibits similarity to 79.6% with SARS-CoV and  
67 about 50% with MERS-CoV (Middle East respiratory syndrome coronavirus), respectively.

68 The phylogenetic analysis has illustrated that SARS-CoV-2 is relatively more similar to  
69 SARS-CoV than MERS-CoV. Based on homology modelling studies, SARS-CoV-2 shares  
70 96.2% nucleotide similarity with RaTG13, a bat CoV from *Rhinolophus Affinis*. The genomic  
71 organisation of SARS-CoV-2 includes '5 UTR, ORF1ab, S, E, M, N and 3'UTR. Its genome  
72 comprises of ORFs which encode for four major structural proteins, Spike glycoprotein (S),  
73 Envelope (E), membrane (M) and Nucleocapsid (N) proteins), 16 Nsps (non- structural  
74 proteins) and nine other accessory proteins [9-11]. ORF1a/b region is the largest ORF that  
75 covers about two- third of whole genome length which encode known sixteen non- structural  
76 proteins (16Nsps). ORFs in the remaining one third of the genome near the 3' end codes for  
77 major structural and other accessory proteins. The ribosomal frameshift (-1) between ORF1a  
78 and ORF1b produces two polypeptides (pp1a and pp1ab) which are proteolytically cleaved  
79 by viral proteases, namely, main protease (M pro) or Chymotrypsin-like protease (3CLpro)  
80 and papain-like protease (PL pro) to release 16 Nsps of 7096 amino acids length. These Nsps  
81 are crucially important in viral replication and transcription processes [8]. Nsps are  
82 considered more conserved than SARS-CoV-2 structural protein [12]. Among the 16 known  
83 SARS-CoV-2 Nsp proteins, the Nsp13 helicase is a crucial component for viral replication  
84 [13] and the most conserved non-structural protein with 99.8% sequence identity to SARS-  
85 CoV Nsp13 [14]. The highest sequence conservation shared by SARS-CoV-2 Nsp13 within  
86 the CoV family, reflects their significant role in viral viability. The Nsp13, RNA helicase  
87 enzyme, also represents a promising therapeutic target for anti-CoV drug development [15-  
88 18].

89 The ongoing rapid transmission and global spread of SARS-CoV-2 has acquired various  
90 mutations. The global advancement in the sequencing efforts of SARS-CoV-2 have reported  
91 several mutations in their proteins like spike protein, nucleocapsid, PLpro and ORF3a from  
92 different population [19-21]. Emerging variants of SARS-CoV-2 with crucial mutations is a  
93 sparkling challenge in context of therapeutics drug and vaccines developed globally. Till  
94 date, there is no specific therapeutics and vaccines available to combat SARS-CoV-2. In view  
95 of this, the present study is focussed on identifying and characterizing the mutations in  
96 SARS-CoV-2 Nsp13 protein that might prove to be useful towards the development of drugs  
97 and effective vaccines against this highly mutable coronavirus. It could also help in  
98 improving the current diagnostic approaches for viral detection, thereby controlling the  
99 transmission of virus. As a consequence of the indispensable role of SARS-Cov-2 Nsp13 in

100 the replication of virus, the study is aimed to understand the possible structural and functional  
101 implications of Nsp13 mutations among Indian isolates.

102

## 103 **MATERIAL AND METHODS**

### 104 *Sequence retrieval and multiple sequence alignments*

105 As of 24 May, 2021, there were 825 ORF1ab protein sequences of Indian SARS-CoV-2  
106 deposited in NCBI Virus database. All these ORF1ab protein sequences (7096 residues)  
107 comprising all non-structural proteins (Nsp1-16) were retrieved from the NCBI-Virus  
108 database. The protein accession numbers of ORF1ab Sequences used in the study are  
109 mentioned in the supplementary Table1. The first reported sequence from China was used as  
110 reference or wild type ORF1ab sequence (accession number: YP\_009724389) for mutational  
111 analysis in the study. The polypeptide sequences of the ORF1ab were exported in the FASTA  
112 format in which the Nsp13 of 601 residues starting from 5325 to 5925 were extracted from  
113 the ORF1ab sequence. Nsp13 is proteolytically cleaved by the protease encoded by the  
114 SARS-CoV-2 genome. The Clustal omega online webserver tool was used for multiple  
115 sequence alignments (MSA) [22,23] to identify the mutations in the amino acid sequences of  
116 Nsp13 among the Indian isolates. Clustal omega is widely used online program for generating  
117 alignments efficiently using fast and reliable algorithm. For this analysis, the Indian  
118 sequences were compared with the reference sequence of Nsp13 (accession number:  
119 YP\_009724389) and then the identified mutant residues were marked carefully and noted for  
120 further analysis.

### 121 *Prediction of effect of mutations on protein stability and dynamicity*

122 In order to understand the impact of mutational changes on the protein stability and  
123 dynamicity of Nsp13, protein modelling studies were performed by using DynaMut, a  
124 webserver tool [24]. The 3D structure of target protein, Nsp13 with PDB ID-6ZSL was used  
125 for protein modelling studies. DynaMut programme is widely used to analyse and visualise  
126 the changes in protein dynamics and stability caused by mutations in the protein in terms of  
127 difference in vibrational entropy ( $\Delta\Delta S$ ) and free energy ( $\Delta\Delta G$ ) between wild type and mutant  
128 protein. The effect of mutations on change in protein stability was estimated by predicted  
129  $\Delta\Delta G$  (Kcal/mol) between wild type and mutant protein. The positive values (more than zero)  
130 indicate the stabilization of protein structure and negative values (below zero) show the  
131 destabilization of protein structure. The Protein flexibility and rigidity were calculated by

132 difference in vibrational entropy ( $\Delta\Delta S$ ) between wild type and mutant protein of Nsp13. The  
133 positive  $\Delta\Delta S$  values correspond to increase in the flexibility of Nsp13 protein whereas, the  
134 negative  $\Delta\Delta S$  values represent the decrease in flexibility of protein.

#### 135 *Prediction of PROVEAN Score*

136 To understand the effect of amino acid variations on the function of Nsp13, PROVEAN  
137 (Protein Variation effect Analyzer) tool was used [25]. This prediction tool was used to  
138 generate a PROVEAN Score for each variant. PROVEAN provides an approach to predict  
139 the functionally important sequence variants. Based on predicted PROVEAN Score, mutants  
140 are classified as deleterious or neutral. The protein variant is predicted to have a deleterious  
141 effect, if the PROVEAN Score is equal to or less than the default threshold score (-2.5) and if  
142 PROVEAN Score is more than the threshold score the variant is predicted to have a neutral  
143 effect. PROVEAN tool is useful to measure the functional effect of protein sequence  
144 variations including amino acid substitutions, insertions, and deletions.

#### 145 *Predictions of B-cell epitopes for Nsp13*

146 B-cell epitopes predictions were performed using an online webserver, IEDB (Immune  
147 Epitope Database) prediction tool [26] as described by Jespersen et al [27]. This prediction  
148 tool predicts the linear continuous B-Cell epitopes of Nsp13 based on Bepipred linear epitope  
149 prediction method using all the standard parameters such as flexibility, hydrophilicity,  
150 accessibility and beta turns at a threshold value of 0.48. The identified epitopes of Nsp13  
151 were further assessed for immunological parameters such as antigenicity, allergenicity and  
152 toxicity (by Toxin Pred). Antigenicity and Allergenicity of peptides were predicted by a  
153 freely available webserver, VaxiJen (<http://www.jenner.ac.uk/VaxiJen>) [28] and Allergen FP  
154 v.1.0 (<http://ddg-pharmfac.net/AllergenFP>) [29]. Moreover, the Discontinuous Bcell epitopes  
155 were also predicted using Disco tope 2.0 webserver tool [30] at a threshold value of -6.6  
156 followed by representing the identified epitopes in the three-dimensional structure of Nsp13  
157 protein. The Discotope score of residues above the threshold value indicates positive  
158 prediction and that below the threshold value indicates negative prediction, respectively.

159

## 160 **RESULTS**

### 161 *Identification of mutations in Nsp13 among Indian SARS-Cov-2 isolates*

162 The Nsp13 SARS-CoV-2 sequences reported from India till 24 May 2021 were aligned with  
163 the reference sequence reported from China (accession number: YP\_009724389) using

164 Clustal omega mediated multiple sequence alignments for mutational analysis. The amino  
165 acid variations in the Nsp13 protein sequences among Indian isolates were identified  
166 carefully and noted for analysis. The analysis revealed the presence of 38 mutations  
167 distributed all over the Nsp13 proteins and the details of each mutation are listed in the  
168 Table1 and their locations observed is represented in the three-dimensional structure of  
169 Nsp13 (PDB ID-6ZSL) using Pymol visualisation tool (Figure1). Our data also demonstrates  
170 the change in polarity and charge upon amino acids mutations in Nsp13. It was found that  
171 most of the mutations do not contribute to any change (Neutral to Neutral). Although, some  
172 of mutations led to alteration in charge from Basic to neutral (H164Y, H290Y, R392C and  
173 R442Q) while only one mutation at position 142 (H142V) altered the charge from acidic to  
174 neutral as depicted in the Table1.

#### 175 *Effect of mutation on stability and flexibility*

176 The mutational analysis for evaluating the impact of mutations on the stability and flexibility  
177 of Nsp13 protein was conducted by DynaMut webserver. This webserver calculated the  
178 difference in free energy( $\Delta\Delta G$ ) between wild type and mutant. The positive  $\Delta\Delta G$  corresponds  
179 to increase in stability while the negative  $\Delta\Delta G$  corresponds to decrease in stability. Our data  
180 demonstrate that a total of 38 mutations caused increase or decrease in the stability of Nsp13  
181 protein. The positive  $\Delta\Delta G$  values in the range of 0.013 to 0.975 kcal/mol shows stabilising  
182 effect (Table1). We have observed the maximum positive  $\Delta\Delta G$  for H164Y (0.975), A237T  
183 (0.924), T214I (0.881), C309Y (0.844), S236I (0.750) and P419S (0.693), indicating  
184 stabilising mutations (Figure 2). While, V305 (-2.53), G54S (-1.69), A308Y (-1.306) shows  
185 the high negative  $\Delta\Delta G$  value, which indicates the destabilization effect on the Nsp13 protein.  
186 (Figure 2). Similarly, the flexibility was also calculated by difference in vibrational entropy  
187 ( $\Delta\Delta S$ ) between wild type and mutant protein of Nsp13. The maximum positive  $\Delta\Delta S$  (0.896)  
188 for H290Y caused increase in the flexibility of Nsp13 protein whereas, the maximum  
189 negative  $\Delta\Delta S$  (-0.725) for A308Y represents the decrease in flexibility of protein (Table 2).  
190 Collectively, our data suggests that mutations identified in the Nsp13 Proteins could alter its  
191 stability and dynamicity.

#### 192 *Effect of Nsp13 mutation on protein function*

193 The PROVEAN score predicts the functional impact of mutations in Nsp13. PROVEAN  
194 Score of mutants equal to or less than the default threshold score (-2.5) were predicted to  
195 have a deleterious effect on Protein whereas, PROVEAN Score more than the threshold score

196 were predicted to have a neutral effect on the respective protein. A total of 38 mutations  
197 reported in Nsp13 among Indian SARS-CoV-2 sequences, includes 15 mutants as neutral and  
198 23 mutants as deleterious based on their predicted PROVEAN Scores as mentioned in the  
199 Table 3.

#### 200 *Prediction of B-cell epitopes*

201 Linear continuous B-cell epitopes of SARS-CoV-2 Nsp13 were predicted by IEDB  
202 webservice tool as shown in figure 3A. The Bepipred score of Nsp13 residues depicts with a  
203 minimum score of -0.161 and a maximum score of -0.651 at threshold value of 0.482. The  
204 data set identified the top seven linear epitopes with at least eight amino acid residues, of  
205 which both their sequences and locations are mentioned in the Figure 3B. These epitopes  
206 were further analyzed for antigenicity, allergenicity and toxicity by *in-silico* based  
207 approaches. The predicted data shows that all of the seven peptides are non -toxic based on  
208 Toxin Pred prediction tool. Out of the seven peptides, three peptides are identified as allergen  
209 and four are non-allergen based on allergenicity prediction (Figure 3B). Similarly, two of  
210 these predicted linear epitopes exhibited antigenicity and the remaining five peptides as non-  
211 antigenic as analyzed by VaxiJen prediction tool (Figure 3B). In addition, discontinuous B-  
212 cell epitopes of Nsp13 were predicted using Discotope 2.0 server tool. The available 3D  
213 structure of Nsp13 in PDB format (PDB ID: 6ZSL) with chain A of protein used as input in  
214 the Discotope 2.0 server tool (Figure 3C). The residues with Discotope score equal or greater  
215 than threshold value (-6.6) was identified as discontinuous epitope residues of Nsp13. The  
216 data sets revealed the identification of 18 B cell epitope residues out of the total residues of  
217 Nsp13 protein at a threshold value of -6.6 (Figure 3D). Histidine and Valine at position 245  
218 and 247, out of 18 predicted residues are significantly positively predicted with high  
219 Discotope score value as depicted in Figure 2D. Overall this data revealed B cell epitopes  
220 contributed by Nsp13.

221

## 222 **DISCUSSIONS**

223 In the present study, we identified 38 mutations in Nsp13 from Indian isolates. The variations  
224 in the SARS-CoV-2 proteins enable us to better understand its diversity, dynamics and  
225 genetic epidemiology [31] that might provide an opportunity in developing effective and safe  
226 therapeutic drugs and vaccines for this highly mutable coronavirus. Our data revealed that the  
227 observed mutations at different positions (H164Y, A237T, T214I, C309Y, S236I, P419S,



228 V305E, G54S, H290Y, P53S, A308Y and A308Y) in the Nsp13 significantly affect the  
229 stability and flexibility of Nsp13 protein. In addition, the alterations in the function of Nsp13  
230 were also predicted upon mutational effect by their Predicted PROVEAN scores.  
231 Furthermore, B-cell epitopes contributed by Nsp13 were identified using various predictive  
232 immunoinformatic tools. Immunological Parameters of Nsp13 such as antigenicity,  
233 allergenicity and toxicity were assessed to predict the potential B-cell epitopes. Predicted *in-*  
234 *silico* epitopes are under urgent consideration in the development of epitope-based peptide  
235 vaccine candidates against SARS-CoV-2. The predicted peptide sequences were correlated  
236 with the observed mutants. Our predicted data showed that there are seven high rank linear  
237 epitopes as well as 18 discontinuous B-cell epitopes based on immunoinformatic findings.  
238 Moreover, it was investigated that, out of total 38 identified mutations among Indian SARS-  
239 CoV-2 Nsp13 protein, four mutant residues at position 142 (E142), 245 (H245), 247 (V247)  
240 and 419 (P419) are localised in the predicted B cell epitopic region (Figure 3). These mutant  
241 residues may help the SARS-CoV-2 variants in eliciting a distinct immune response from the  
242 wild type SARS-CoV-2. Several previous studies evidently support the findings with similar  
243 observations using the immunoinformatic approaches [32-34]. Hence, our study provides  
244 some insights in understanding the Nsp13 epitopes which could regulate host immune  
245 responses against SARS-CoV-2. The present *in-silico* study revealed the impact of identified  
246 mutations on the stability and flexibility of Nsp13 protein. Further *in-vivo* studies are  
247 necessary to better understand and validate the effect of mutations on the immunogenicity of  
248 epitopes of SARS-CoV-2.

249

## 250 **CONCLUSION**

251 The emergence of a novel coronavirus, SARS-CoV-2 has become a major global concern  
252 with an unprecedented public health crisis. Understanding the genomic variations in SARS-  
253 CoV-2 could help in improving the current diagnostic techniques and developing suitable  
254 vaccine candidates against the SARS-CoV-2 infections. Altogether, the results of the present  
255 *in-silico* study show the various mutations in Nsp13 from Indian SARS-CoV-2 and their  
256 implications on stability, flexibility and function of Nsp13 protein using predictive tools of  
257 immunoinformatics. Non- structural proteins exhibit low glycation density as compared to the  
258 structural proteins of SARS-CoV-2. Therefore, epitopes of Nsp13 could be used as effective  
259 and promising target against SARS-CoV-2.

260



261 **Author contributions**

262 AK has conceived the study and contributed in study-design, data interpretation, and manuscript  
263 preparation. DK has performed the experiments, analyzed data, and prepared manuscript. NK, SK,  
264 PKS, SKS and NRB have contributed in the conceptualization of the study and reviewing the  
265 manuscript.  
266

267 **Conflict of interest**

268 There are no conflicts to declare.

269 **Funding**

270 No funding was used to conduct this research.

271 **ACKNOWLEDGEMENTS**

272 Declare none

273

274 **REFERENCES**

- 275 1. Lu R, Zhao X, Li J, et al. Genomic characterisation and epidemiology of 2019 novel  
276 coronavirus: implications for virus origins and receptor binding. *Lancet*. 2020;  
277 395(10224):565–574.
- 278 2. Zhu N, Zhang D, and Wang W. A novel coronavirus from patients with pneumonia in  
279 China. *New England Journal of Medicine*. 2019; 382: 727–733.
- 280 3. Lai CC, Shih TP, Ko WC, Tang HJ, Hsueh PR. Severe acute respiratory syndrome  
281 coronavirus 2 (SARS-CoV-2) and coronavirus disease-2019 (COVID-19): the  
282 epidemic and the challenges. *Int. J. Antimicrob. Agents*. 2020.55:105924.
- 283 4. Rothan HA, Byrareddy SN. The epidemiology and pathogenesis of coronavirus  
284 disease (COVID-19) outbreak. *J. Autoimmun*. 2020. 109:102433.
- 285 5. Rabi FA, Al-Zoubi MS, Al-Nasser AD, Kasasbeh GA, Salameh DM. Sars-cov-2 and  
286 coronavirus disease 2019: what we know so far. *Pathogens*. 2020.9:231.
- 287 6. Fung, TS, Liu D X. Human Coronavirus: Host-Pathogen Interaction. *Annu. Rev.*  
288 *Microbiol*. 2019, 73, 529–557.
- 289 7. Wu A, Peng Y, Huang B, Ding X, Wang X, Niu P, Meng J, Zhu Z, Zhang Z, Wang J.  
290 Genome composition and divergence of the novel coronavirus (2019- nCoV)  
291 originating in China. *Cell Host Microbe*. 2020, 27: 325–328.

- 292 8. Yashvardhini N and Jha DK. Genome organization and pathogenesis of SARS-CoV-  
293 2. *International Journal of Current Microbiology and Applied Sciences*. 2020; 9(9):  
294 2153–2156.
- 295 9. Khailany RA, Safdar M, Ozaslan M. Genomic characterization of a novel SARS-  
296 CoV-2. *Gene Rep*. 2020;19(100682):1-6.
- 297 10. Gordon D, Jang G, and Bouhaddou M. A SARS-CoV-2- human protein-protein  
298 interaction map reveals drug targets and potential drug-repurposing. *BioRxiv*. 2020.
- 299 11. Wu F, Zhao S, Yu B, et al. A new coronavirus associated with human respiratory  
300 disease in China. *Nature*. 2020; 579(7798): 265–269.
- 301 12. Yang D and Leibowitz JL. The structure and functions of coronavirus genomic 3' and  
302 5' ends. *Virus Research*. 2015; 206: 120–133.
- 303 13. Ivanov KA, Thiel V, Dobbe JC, van der Meer Y, Snijder EJ, Ziebuhr J. Multiple  
304 Enzymatic Activities Associated with Severe Acute Respiratory Syndrome  
305 Coronavirus Helicase. *J. Virol*. 2004.
- 306 14. White MA, Lin W, Cheng X. Discovery of COVID-19 Inhibitors Targeting the  
307 SARS-CoV-2 Nsp13 Helicase. *J. Phys. Chem. Lett*. 2020; 11:9144-9155.
- 308 15. Chen J, Malone B, Llewellyn E, Grasso M, Shelton PMM, Olinares PDB, Maruthi K,  
309 Eng ET, Vatandaslar H, Chait BT, Kapoor TM, Darst SA, Campbell EA. Structural  
310 Basis for Helicase-Polymerase Coupling in the SARS-CoV-2 Replication-  
311 Transcription Complex. *Cell*. 2020; 182:1560-1573.
- 312 16. Yu MS, Lee J, Lee JM, Kim Y, Chin YW, Jee JG, Keum YS, Jeong YJ. Identification  
313 of Myricetin and Scutellarein as Novel Chemical Inhibitors of the SARS Coronavirus  
314 Helicase, Nsp13. *Bioorg. Med. Chem. Lett*. 2012; 22 (12): 4049–4054.
- 315 17. Adedeji AO, Singh K, Calcaterra NE, DeDiego ML, Enjuanes L, Weiss S, Sarafianos  
316 SG. Severe Acute Respiratory Syndrome Coronavirus Replication Inhibitor That  
317 Interferes with the Nucleic Acid Unwinding of the Viral Helicase. *Antimicrob. Agents  
318 Chemother*. 2012; 56 (9):4718–4728.
- 319 18. Adedeji AO, Sarafianos SG. Antiviral Drugs Specific for Coronaviruses in Preclinical  
320 Development. *Curr. Opin. Virol*. 2014; 8: 45–53.
- 321 19. Pachetti M, Marini B, Benedetti F, Giudici F, Mauro E, Storici P, Masciovecchio C,  
322 et al. Emerging SARS-CoV-2 mutation hot spots include a novel RNA-dependent-  
323 RNA polymerase variant. *J. Transl. Med*. 2020.

- 324 20. Chand GB, Banerjee A, Azad GK. Identification of novel mutations in RNA  
325 dependent RNA polymerases of SARS-CoV-2 and their implications on its protein  
326 structure. *Peer J*. 2020; 8: e9492.
- 327 21. Chand GB, Banerjee A, Azad GK. Identification of twenty-five mutations in surface  
328 glycoprotein (Spike) of SARS-CoV-2 among Indian isolates and on their protein  
329 dynamics. *Gene Rep*. 2020; 21: 100891.
- 330 22. Madeira F, Park YM, Lee J, Buso N, Gur T, Madhusoodanan N, Basutkar P, Tivey  
331 ARN, Potter SC, Finn RD, Lopez R. The EMBL-EBI search and sequence analysis  
332 tools APIs in 2019. *Nucleic Acids Res*. 2019.
- 333 23. Azad GK. Identification of novel mutations in the methyltransferase complex (Nsp10-  
334 Nsp16) of SARS-CoV-2. *Biochem. Biophys. Reports*. 2020;24(100833):1-7.
- 335 24. Rodrigues CHM, Pires DEV, Ascher DB. DynaMut: predicting the impact of  
336 mutations on protein conformation, flexibility and stability. *Nucleic Acids Res*. 2018.
- 337 25. Choi Y, Sims GE, Murphy S, Miller JR, Chan AP. Predicting the functional effect of  
338 amino acid substitutions and indels. *PLoS One*. 2012;7(10):46688.
- 339 26. Vita R, Mahajan S, Overton JA, Dhanda SK, Martini S, Cantrell JR, Wheeler DK,  
340 Sette A, Peters B, The Immune Epitope Database (IEDB): 2018 update. *Nucleic Acids*  
341 *Res*. 2019. <https://doi.org/10.1093/nar/gky1006>.
- 342 27. Jespersen MC, Peters B, Nielsen M, Marcatili P. BepiPred-2.0: improving sequence-  
343 based B-cell epitope prediction using conformational epitopes. *Nucleic Acids Res*.  
344 2017.
- 345 28. Doytchinova IA, Flower DR. VaxiJen: A server for prediction of protective antigens,  
346 tumour antigens and subunit vaccines, *BMC Bioinformatics*. 2007.
- 347 29. Dimitrov L, Naneva I, Doytchinova I, Bangov I. AllergenFP: Allergenicity prediction  
348 by descriptor fingerprints. *Bioinformatics*. 2014;30(6):846-851.
- 349 30. Kringelum JV, Lundegaard C, Lund O, Nielsen M. Reliable B Cell Epitope  
350 Predictions: Impacts of Method Development and Improved Benchmarking. *PLoS*  
351 *Comput. Biol*. 2012;8(12): e1002829.
- 352 31. Sironi M, Hasnain SE, Rlsenthlal B, et al. SARS-CoV-2 and COVID-19: A genetic,  
353 epidemiological, and evolutionary perspective. *Infect. Genet. Evol*. 2020; 84:104384.
- 354 32. Nabel GJ. Designing tomorrow's vaccines. *New England Journal of Medicine*. 2103;  
355 368(6): 551–560.
- 356 33. Majumdar P, Niyogi S. ORF3a mutation associated higher mortality rate in SARS-  
357 CoV-2 infection. *Epidemiol. Infect*. 2020.

358 34. Azad GK, Khan PK. Variations in Orf3a protein of SARS-CoV-2 alter its structure  
359 and function. *Biochem. Biophys. Reports.* 2021; 26:100933.

360

361

362

363

364

365 TABLE AND FIGURE LEGENDS

366 Table 1. list of identified mutations in Nsp13 among Indian isolates.

| <b>S. No.</b> | <b>Mutation</b> | <b>Polarity changes</b> | <b>Charge changes</b> |
|---------------|-----------------|-------------------------|-----------------------|
| 1             | P53S            | NP to P                 | Neutral to Neutral    |
| 2             | G54S            | P to P                  | Neutral to Neutral    |
| 3             | T58A            | P to NP                 | Neutral to Neutral    |
| 4             | M68K            | NP to P                 | Neutral to Basic      |
| 5             | V98F            | NP to NP                | Neutral to Neutral    |
| 6             | S100G           | P to P                  | Neutral to Neutral    |
| 7             | E142V           | P to NP                 | Acidic to Neutral     |
| 8             | V154L           | NP to NP                | Neutral to Neutral    |
| 9             | H164Y           | P to P                  | Basic to Neutral      |
| 10            | S166A           | P to NP                 | Neutral to Neutral    |
| 11            | T214I           | P to NP                 | Neutral to Neutral    |
| 12            | V226L           | NP to NP                | Neutral to Neutral    |
| 13            | L227Q           | NP to P                 | Neutral to Neutral    |
| 14            | T228K           | P to P                  | Neutral to Basic      |
| 15            | S236I           | P to NP                 | Neutral to Neutral    |
| 16            | A237T           | NP to P                 | Neutral to Neutral    |
| 17            | H245R           | P to P                  | Basic to Basic        |
| 18            | V247F           | NP to NP                | Neutral to Neutral    |
| 19            | Y253H           | P to P                  | Neutral to Basic      |
| 20            | S259T           | P to P                  | Neutral to Neutral    |
| 21            | M274V           | NP to NP                | Neutral to Neutral    |
| 22            | H290Y           | P to P                  | Basic to Neutral      |
| 23            | A296S           | NP to P                 | Neutral to Neutral    |
| 24            | L297F           | NP to NP                | Neutral to Neutral    |
| 25            | P300L           | NP to NP                | Neutral to Neutral    |
| 26            | I304K           | NP to P                 | Neutral to Basic      |
| 27            | V305E           | NP to P                 | Neutral to Acidic     |
| 28            | A308Y           | NP to P                 | Neutral to Neutral    |
| 29            | C309Y           | P to P                  | Neutral to Neutral    |
| 30            | S310Y           | P to P                  | Neutral to Neutral    |
| 31            | D315E           | P to P                  | Acidic to Acidic      |

|    |       |          |                    |
|----|-------|----------|--------------------|
| 32 | L384M | NP to NP | Neutral to Neutral |
| 33 | R392C | P to P   | Basic to Neutral   |
| 34 | P419S | NP to P  | Neutral to Neutral |
| 35 | R442Q | P to P   | Basic to Neutral   |
| 36 | P504S | NP to P  | Neutral to Neutral |
| 37 | P504L | NP to NP | Neutral to Neutral |
| 38 | I575L | NP to NP | Neutral to Neutral |

367

368 Table 2. Predicted  $\Delta\Delta G$  and  $\Delta\Delta S_{vib}$  between wild type and mutant Nsp 13 Protein.

| S. No | Chain ID | Mutation | Predicted $\Delta\Delta G$ (kcal/mol) | Stability     | Predicted $\Delta\Delta S_{vib}ENCoM$ (kcal. mol <sup>-1</sup> . K <sup>-1</sup> ) | Flexibility |
|-------|----------|----------|---------------------------------------|---------------|------------------------------------------------------------------------------------|-------------|
| 1     | A        | P53S     | 0.024                                 | Stabilizing   | 0.504                                                                              | Increase    |
| 2     | A        | G54S     | -1.694                                | Destabilizing | 0.130                                                                              | Increase    |
| 3     | A        | T58A     | -0.260                                | Destabilizing | 0.358                                                                              | Increase    |
| 4     | A        | M68K     | 0.188                                 | Stabilizing   | 0.165                                                                              | Increase    |
| 5     | B        | V98F     | 0.160                                 | Stabilizing   | -0.193                                                                             | Decrease    |
| 6     | B        | S100G    | -0.157                                | Destabilizing | 0.413                                                                              | Increase    |
| 7     | A        | E142V    | -0.174                                | Destabilizing | 0.260                                                                              | Increase    |
| 8     | A        | V154L    | 0.235                                 | Stabilizing   | 0.031                                                                              | Increase    |
| 9     | A        | H164Y    | 0.975                                 | Stabilizing   | -0.375                                                                             | Decrease    |
| 10    | A        | S166A    | -0.100                                | Destabilizing | 0.145                                                                              | Increase    |
| 11    | A        | T214I    | 0.881                                 | Stabilizing   | -0.339                                                                             | Decrease    |
| 12    | A        | V226L    | 0.528                                 | Stabilizing   | -0.236                                                                             | Decrease    |
| 13    | A        | L227Q    | -0.268                                | Destabilizing | 0.015                                                                              | Increase    |
| 14    | A        | T228K    | 0.525                                 | Stabilizing   | -0.315                                                                             | Decrease    |
| 15    | A        | S236I    | 0.750                                 | Stabilizing   | -0.370                                                                             | Decrease    |
| 16    | A        | A237T    | 0.924                                 | Stabilizing   | -0.424                                                                             | Decrease    |
| 17    | A        | H245R    | -0.154                                | Destabilizing | 0.147                                                                              | Increase    |
| 18    | A        | V247F    | -0.096                                | Destabilizing | -0.102                                                                             | Decrease    |
| 19    | A        | Y253H    | 0.309                                 | Stabilizing   | -0.109                                                                             | Decrease    |
| 20    | A        | S259T    | 0.031                                 | Stabilizing   | -0.031                                                                             | Decrease    |
| 21    | A        | M274V    | -0.690                                | Destabilizing | 0.441                                                                              | Increase    |
| 22    | A        | H290Y    | 0.562                                 | Stabilizing   | 0.896                                                                              | Increase    |
| 23    | A        | A296S    | -1.135                                | Destabilizing | -0.128                                                                             | Decrease    |
| 24    | A        | L297F    | 0.013                                 | Stabilizing   | -0.252                                                                             | Decrease    |
| 25    | A        | P300L    | 0.362                                 | Stabilizing   | -0.427                                                                             | Decrease    |
| 26    | A        | I304K    | -0.410                                | Destabilizing | -0.022                                                                             | Decrease    |
| 27    | A        | V305E    | -2.531                                | Destabilizing | 0.179                                                                              | Increase    |
| 28    | A        | A308Y    | -1.306                                | Destabilizing | -0.725                                                                             | Decrease    |
| 29    | A        | C309Y    | 0.844                                 | Stabilizing   | -0.552                                                                             | Decrease    |
| 30    | A        | S310Y    | 0.348                                 | Stabilizing   | -0.630                                                                             | Decrease    |
| 31    | A        | D315E    | -0.364                                | Destabilizing | 0.331                                                                              | Increase    |
| 32    | A        | L384M    | -1.266                                | Destabilizing | -0.221                                                                             | Decrease    |
| 33    | A        | R392C    | -0.347                                | Destabilizing | 0.206                                                                              | Increase    |
| 34    | A        | P419S    | 0.693                                 | Stabilizing   | -0.661                                                                             | Decrease    |
| 35    | A        | R442Q    | -0.180                                | Destabilizing | 0.381                                                                              | Increase    |

|           |   |       |        |               |        |          |
|-----------|---|-------|--------|---------------|--------|----------|
| <b>36</b> | A | P504S | -0.122 | Destabilizing | -0.052 | Decrease |
| <b>37</b> | A | P504L | 0.601  | Stabilizing   | -0.050 | Decrease |
| <b>38</b> | A | I575L | -0.723 | Destabilizing | -0.013 | Decrease |

369

370 Table 3. Predicted PROVEAN score of Nsp13 mutations and its impact on protein function.

| <b>S. No</b> | <b>Mutations</b> | <b>PROVEAN Score</b> | <b>Effect on protein</b> |
|--------------|------------------|----------------------|--------------------------|
| 1            | P53S             | -1.633               | Neutral                  |
| 2            | G54S             | -4.046               | Deleterious              |
| 3            | T58A             | -0.506               | Neutral                  |
| 4            | M68K             | -4.499               | Deleterious              |
| 5            | V98F             | -2.368               | Neutral                  |
| 6            | S100G            | -3.933               | Deleterious              |
| 7            | E142V            | -6.883               | Deleterious              |
| 8            | V154L            | -0.076               | Neutral                  |
| 9            | H164Y            | 1.312                | Neutral                  |
| 10           | S166A            | -1.205               | Neutral                  |
| 11           | T214I            | -5.162               | Deleterious              |
| 12           | V226L            | -2.763               | Deleterious              |
| 13           | L227Q            | -5.900               | Deleterious              |
| 14           | T228K            | -5.300               | Deleterious              |
| 15           | S236I            | -3.281               | Deleterious              |
| 16           | A237T            | -3.781               | Deleterious              |
| 17           | H245R            | 1.779                | Neutral                  |
| 18           | V247F            | -1.795               | Neutral                  |
| 19           | Y253H            | -1.608               | Neutral                  |
| 20           | S259T            | -1.184               | Neutral                  |
| 21           | M274V            | -1.983               | Neutral                  |
| 22           | H290Y            | -5.300               | Deleterious              |
| 23           | A296S            | -1.750               | Neutral                  |
| 24           | L297F            | -2.686               | Deleterious              |
| 25           | P300L            | -6.932               | Deleterious              |
| 26           | I304K            | -6.272               | Deleterious              |
| 27           | V305E            | -5.552               | Deleterious              |
| 28           | A308Y            | -5.900               | Deleterious              |
| 29           | C309Y            | -8.317               | Deleterious              |
| 30           | S310Y            | -5.786               | Deleterious              |
| 31           | D315E            | -3.933               | Deleterious              |
| 32           | L384M            | -1.983               | Neutral                  |
| 33           | R392C            | -2.731               | Deleterious              |
| 34           | P419S            | -8.000               | Deleterious              |
| 35           | R442Q            | 0.467                | Neutral                  |
| 36           | P504S            | -6.025               | Deleterious              |
| 37           | P504L            | -8.158               | Deleterious              |
| 38           | I575L            | -1.800               | Neutral                  |

371

372 Supplementary Table 1: list of protein accession number used in the study.

373 Figure 1: Three-dimensional structure of SARS-CoV-2 Nsp13 (PDB ID: 6ZSL) depicting the  
374 location of identified mutations in this study.

375 Figure 2: Visual representation of top 12 mutations contributed by Nsp13 that includes  
376 P53S,G54S, H164Y, T214I, S236I, A237T, C309Y, H290Y, V305E, A308Y, C309Y, S310Y  
377 and P419S, respectively. In each panel , the wild type and mutant residues of Nsp13 in their  
378 respective three dimensional structures are highlighted in the light green color. The  
379 intramolecular interactions between the highlighted residues and neighbouring residues in the  
380 Nsp13 protein are also indicated.

381 Figure 3: Prediction of B-cell epitopes of Nsp13. A) Prediction of linear B-cell epitopes. Y  
382 axis of the graph depicts the Bepipred Score, while the X-axis depicts the residues position of  
383 Nsp13. The yellow area of the graph indicates the part of protein with higher probability to be  
384 localised as epitope. B) The top seven predicted peptides of Nsp13. The red font color  
385 indicate the location of mutant residues in the peptide sequence. C) Prediction of  
386 Discontinuous B-cell epitopes. The prediction of discontinuous epitope residues on the 3-D  
387 structure of Nsp13 (PDB ID: 6ZSL). D) The position and identity of each discontinuous  
388 epitope residues of Nsp13.

389

390

391

392

393

394

395

396

397

398



399

400

401

402 Figure 1

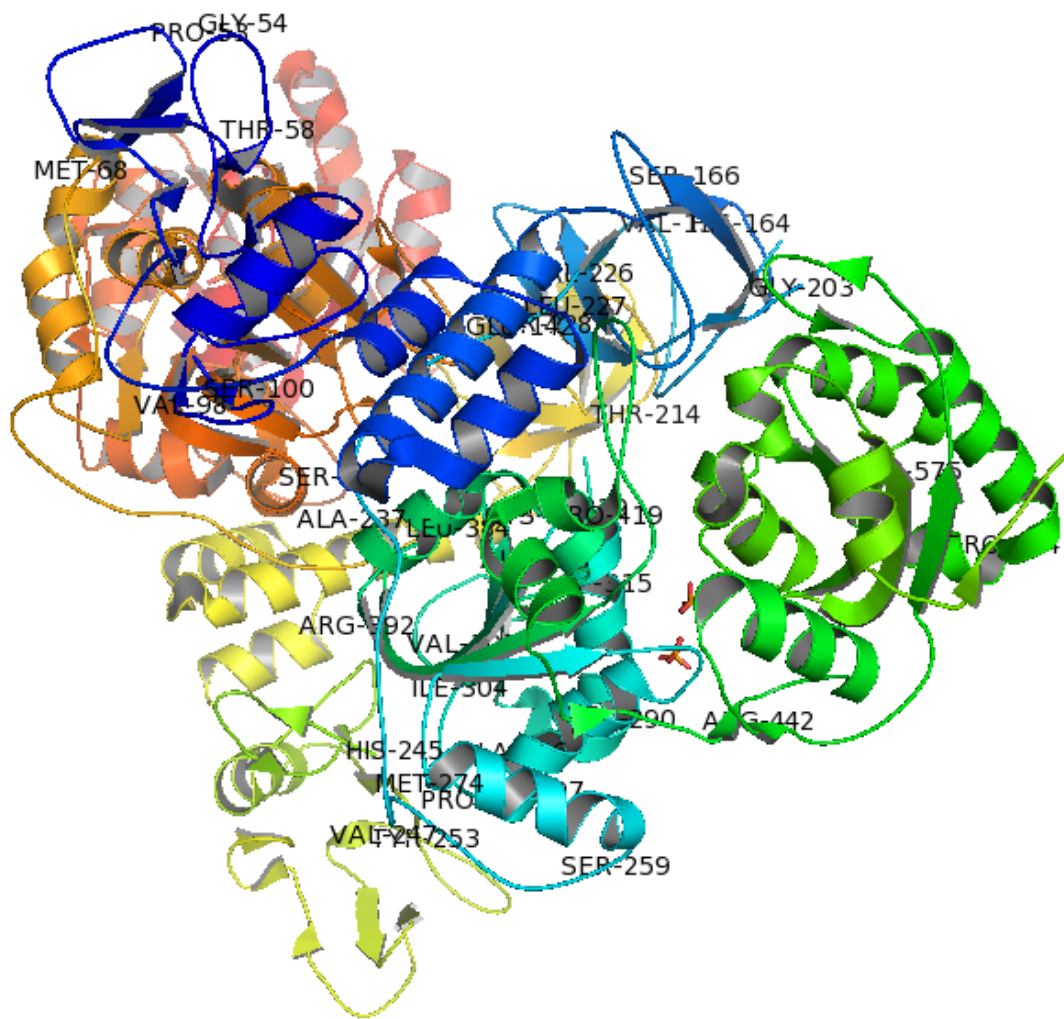

403

404

405

406

407

408

409

410 Figure 2

411

**Wild type**

**Mutant**

412 **P53S**

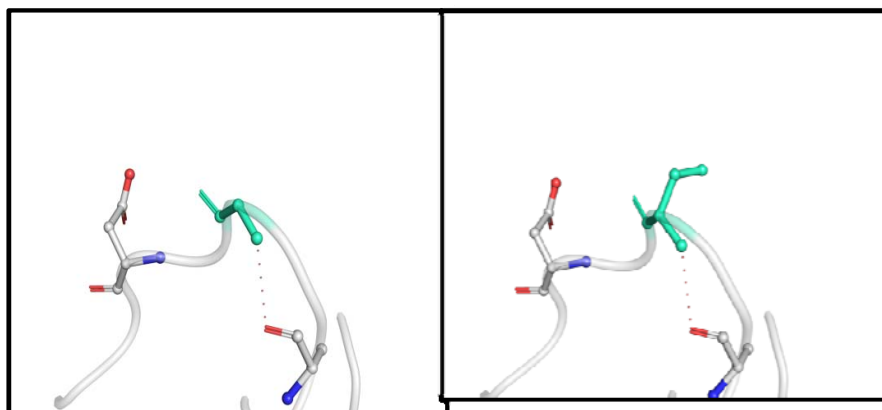

413 **G54S**

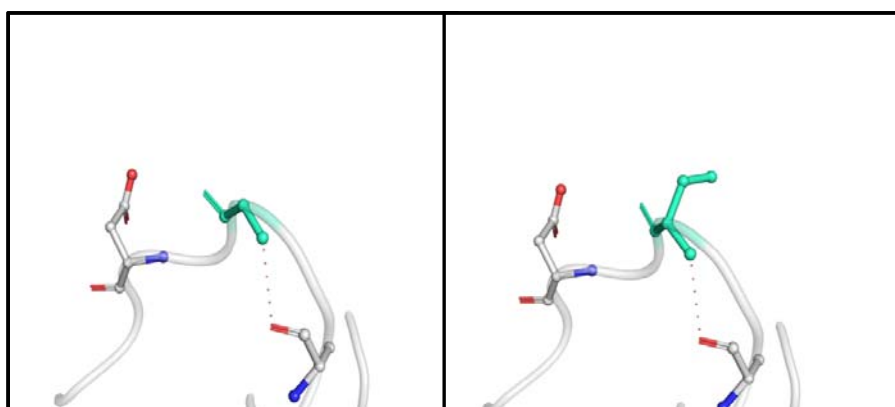

414 **H164Y**

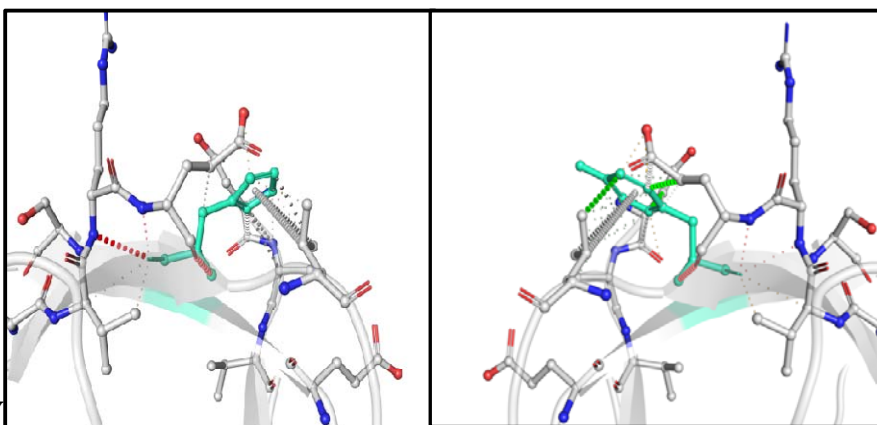

415 **T214I**

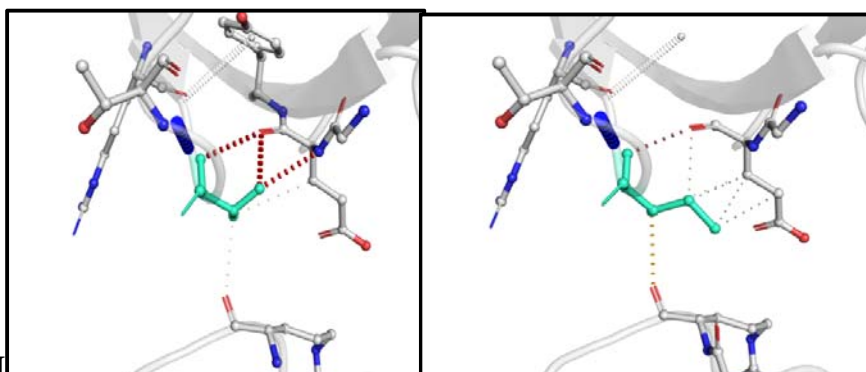

416

**S236I**

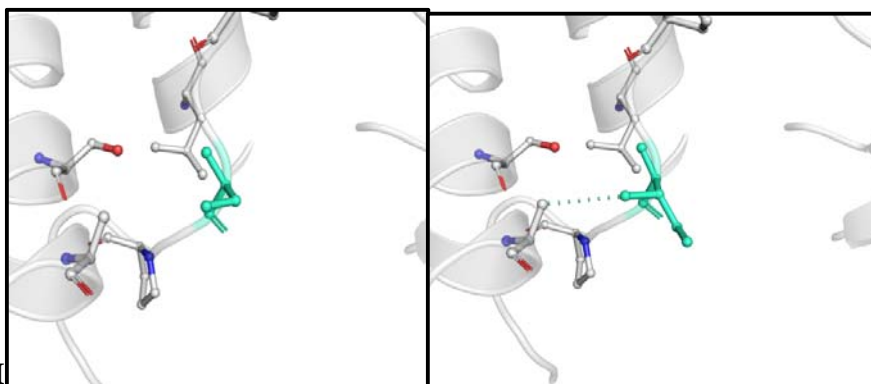

417

**A237T**

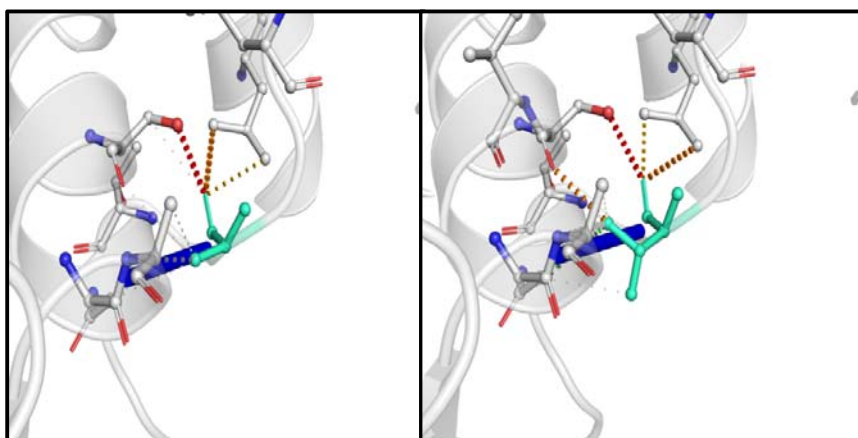

418

**H290Y**

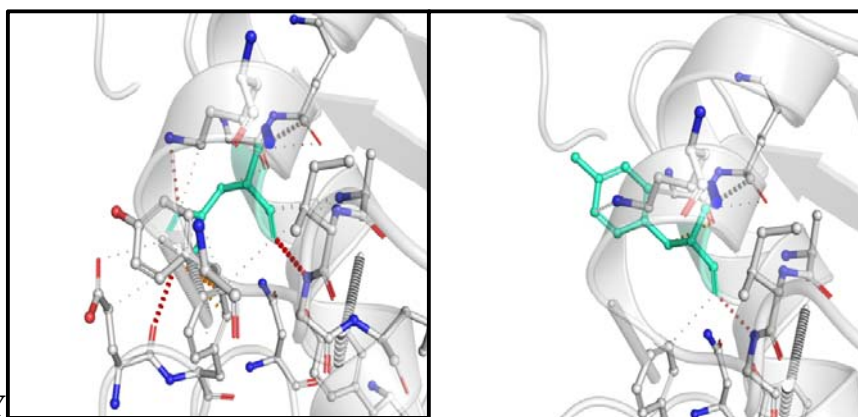

419

420 **V305E**

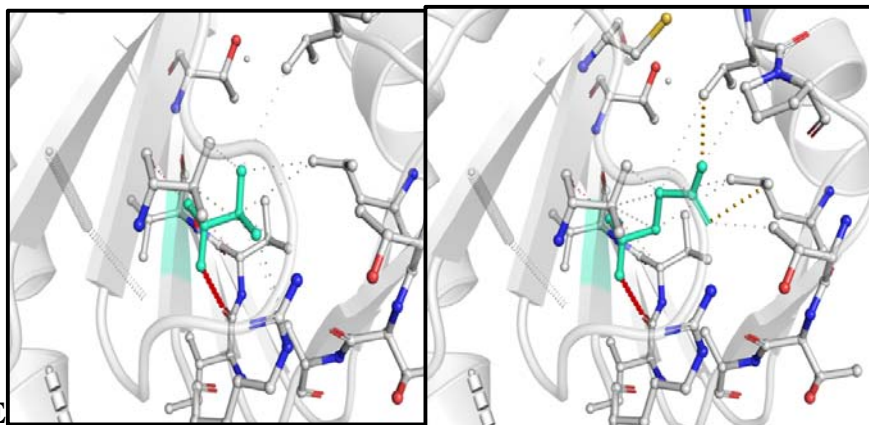

421 **A308Y**

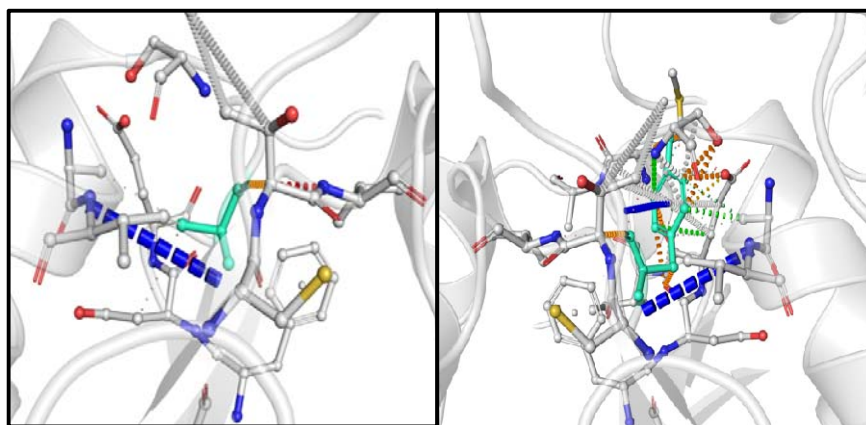

422 **C309Y**

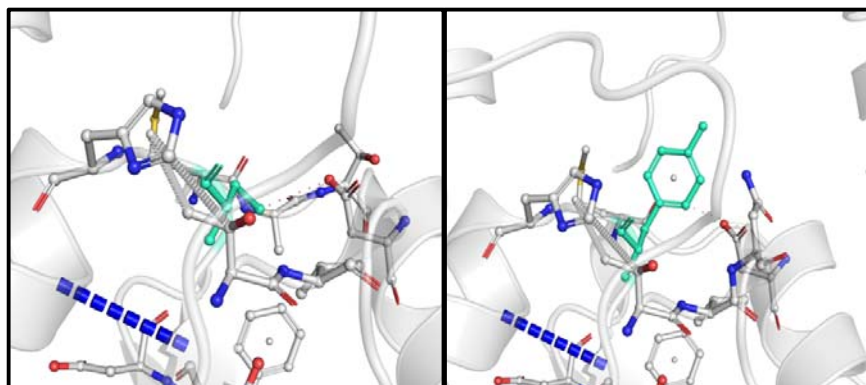

423 **S310Y**

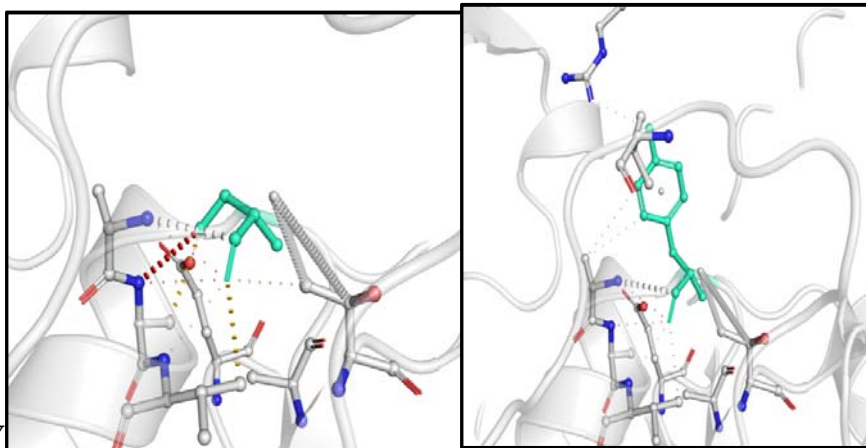

424 **P419S**

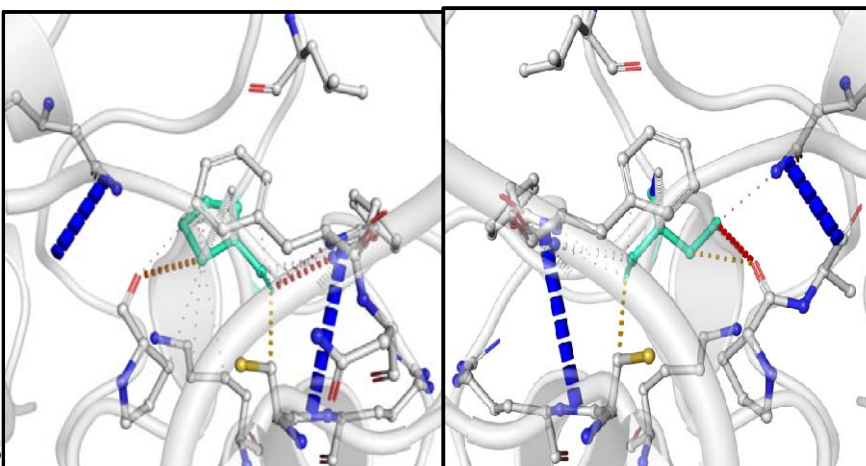

425

426

427

428

429

430

431

432

433

434

435

436

437

438



439

440 Figure 3

441 A

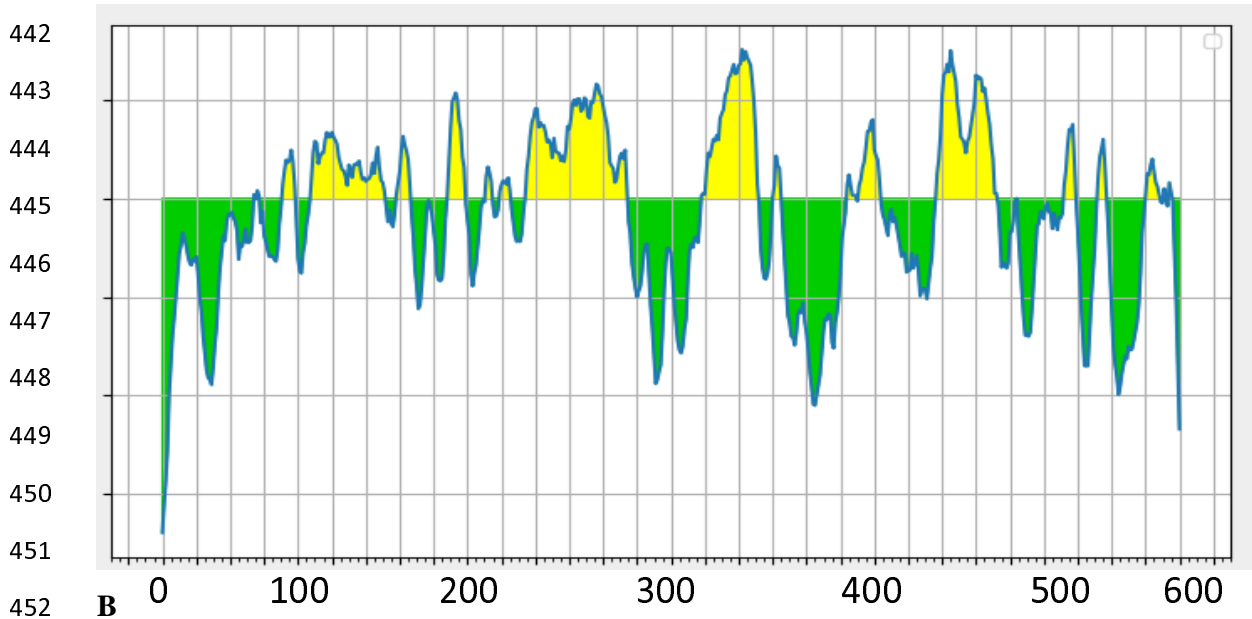

452

| Peptide sequence                             | (Start – End) position | Antigenicity             | Allergenicity     | Toxicity  |
|----------------------------------------------|------------------------|--------------------------|-------------------|-----------|
| <b>CKSHKPPI</b>                              | 72-79                  | 0.0630<br>(Non-antigen)  | Probable Allergen | Non-Toxin |
| <b>KATEETF<sup>E</sup>FKL</b>                | 139-147                | 0.2766<br>(Non-antigen)  | Non-Allergen      | Non-Toxin |
| <b>VGKPRPPLNRN</b>                           | 169-179                | -0.7764<br>(Non-antigen) | Probable Allergen | Non-Toxin |
| <b>EKALKYLPIDKCSRIIPARARVECFDKFKVNS TL</b>   | 319-352                | 0.3558<br>(Non-antigen)  | Non-Allergen      | Non-Toxin |
| <b>LTKGTLE<sup>E</sup>PEYFNS</b>             | 412-424                | 0.9626<br>(Antigen)      | Non-Allergen      | Non-Toxin |
| <b>DNKLKAHKDKSAQCFKMFYKGVITHDVSSA INRPQI</b> | 458-493                | -0.0846<br>(Non-antigen) | Probable Allergen | Non-Toxin |
| <b>LYDKLQFTS</b>                             | 581-589                | 1.0664<br>(Antigen)      | Non-Allergen      | Non-Toxin |

453

454 C

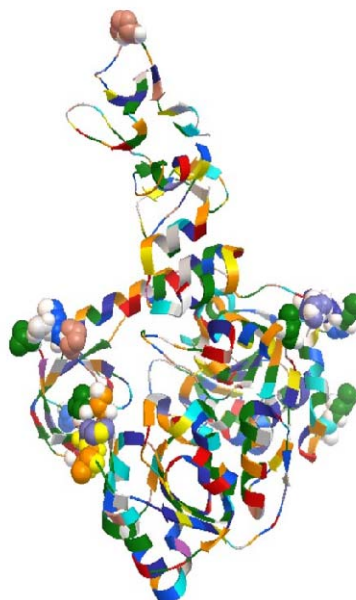

455

456

457

458 D

| S.No. | Chain | Residues No. | Amino Acid |
|-------|-------|--------------|------------|
| 1     | A     | 78           | PRO        |
| 2     | A     | 160          | ASP        |
| 3     | A     | 169          | VAL        |
| 4     | A     | 170          | GLY        |
| 5     | A     | 171          | LYS        |
| 6     | A     | 172          | PRO        |
| 7     | A     | 218          | LYS        |
| 8     | A     | 245          | HIS        |
| 9     | A     | 246          | TYR        |
| 10    | A     | 247          | VAL        |
| 11    | A     | 248          | ARG        |
| 12    | A     | 256          | LEU        |
| 13    | A     | 257          | ASN        |
| 14    | A     | 432          | ILE        |
| 15    | A     | 481          | THR        |
| 16    | A     | 482          | HIS        |
| 17    | A     | 484          | VAL        |
| 18    | A     | 485          | SER        |

459

460



461

462

463

464

465

466

467

468
